# Supplementary material for: Interplay between Peptide Bond Geometrical Parameters in Nonglobular Structural Contexts
Source: Hindawi journal article supplement (doi:10.1155/2013/326914), 2013-01-01
Supplement: f1 [file 326914.f1.pdf]

Supplementary Material

**Interplay between peptide bond geometrical parameters in non-globular structural contexts**

Luciana Esposito, Nicole Balasco, Alfonso De Simone, Rita Berisio, Luigi Vitagliano.

A

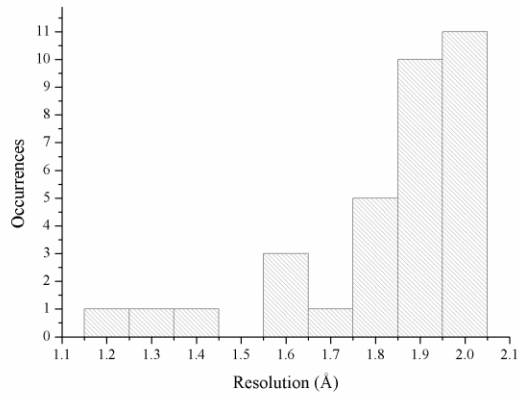

B

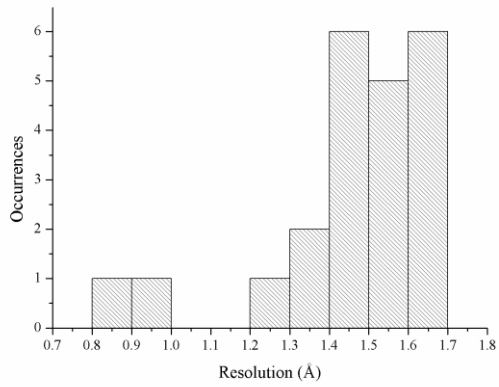

Figure S1: Distribution of the resolution of membrane protein (A) and amyloid-like peptide (B) crystal structures considered in the present study.

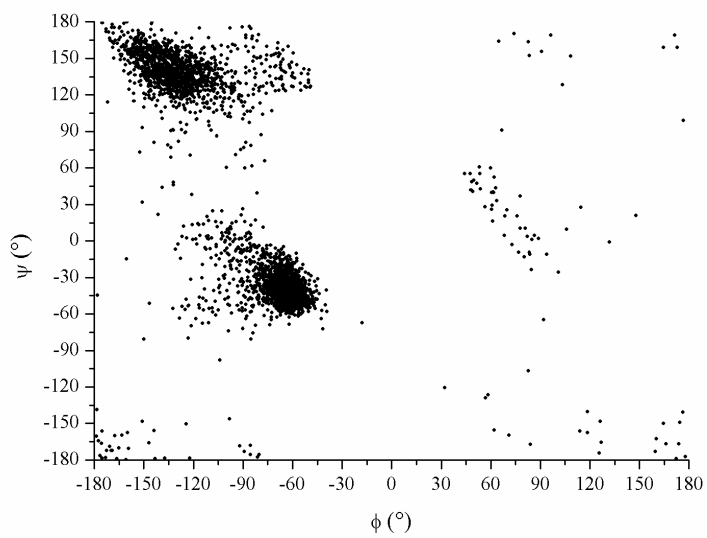

Figure S2: Overall Ramachandran plot for residues of membrane protein structures.

A

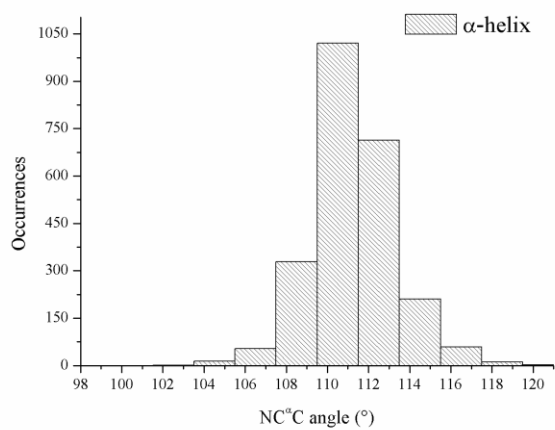

B

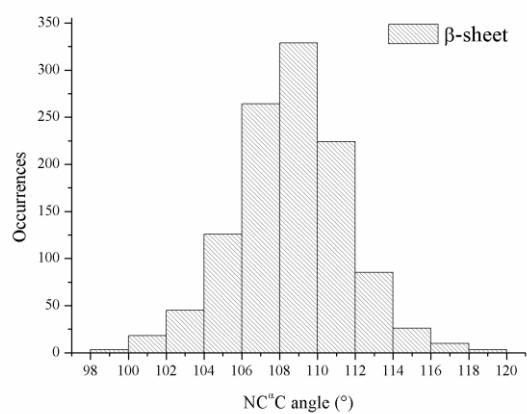

C

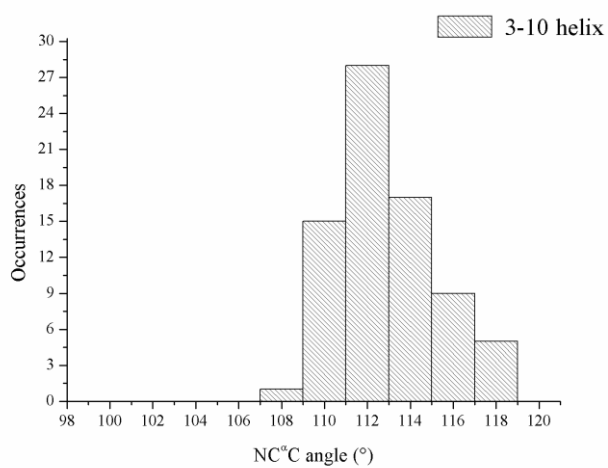

Figure S3. Distribution of N-C<sup>α</sup>-C values for residues in  $\alpha$ -helices (A),  $\beta$ -sheets (B) and 3-10 helices (C) of membrane proteins.

A

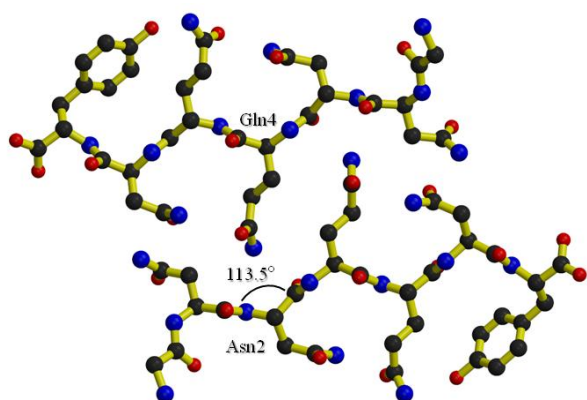

B

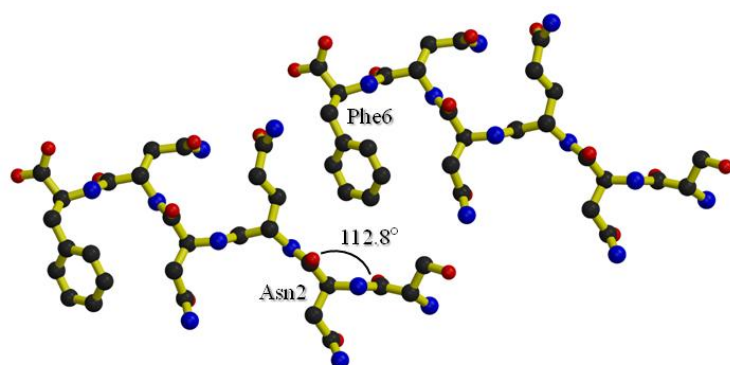

C

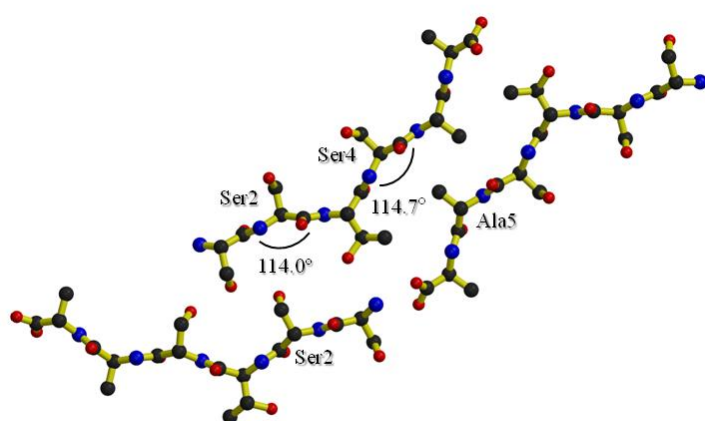

Figure S4. Examples of steric zipper assemblies: GNNQQNY (A), SNQQNF (B), SSTSSA (C). The deformation of some angles induced by interdigitation is shown.

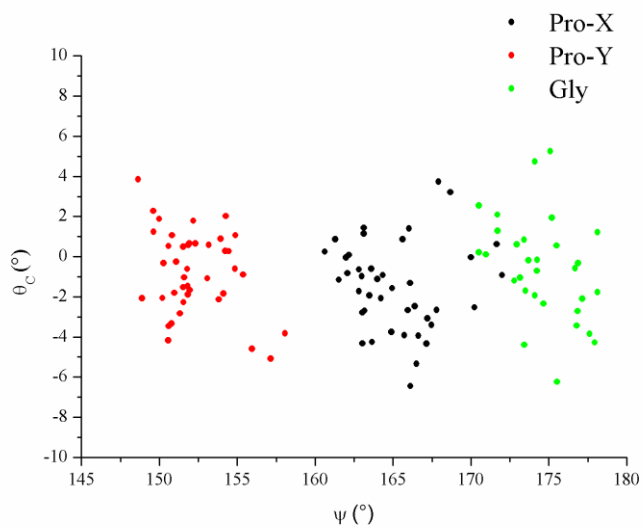

Figure S5:  $\theta_C$  versus  $\psi$  for residues of the collagen-like peptide (Pro-Pro-Gly)<sub>9</sub>.
